# Supplementary material for: An Internal Standard-Assisted Synthesis and Degradation Proteomic Approach Reveals the Potential Linkage between VPS4B Depletion and Activation of Fatty Acid β-Oxidation in Breast Cancer Cells
Source: PubMed Central journal article supplement (PMC3575666; doi:10.1155/2013/291415), 2013-02-04
Supplement: 291415.f1.pdf [file 291415.f1.pdf]

Supplementary Figure 1:

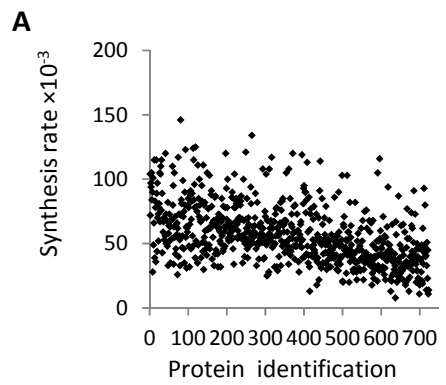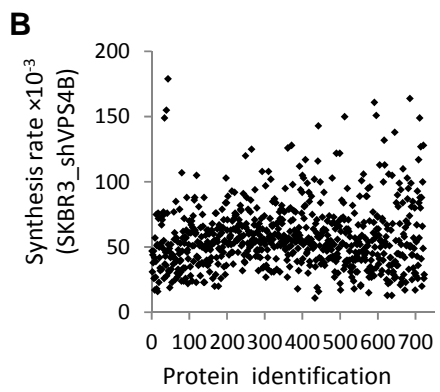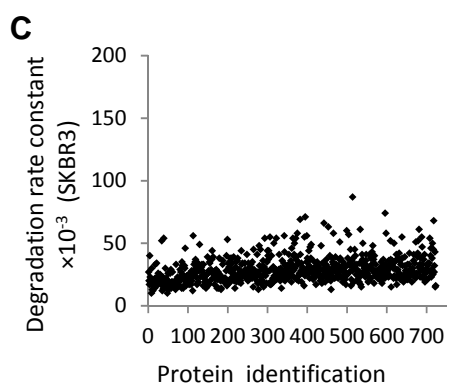

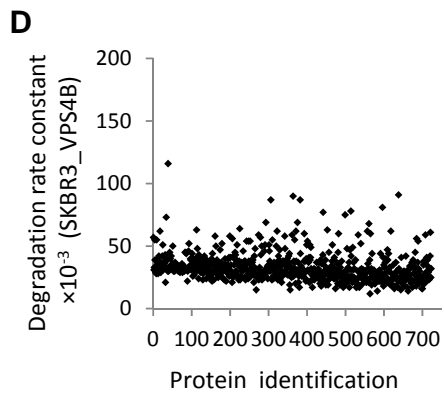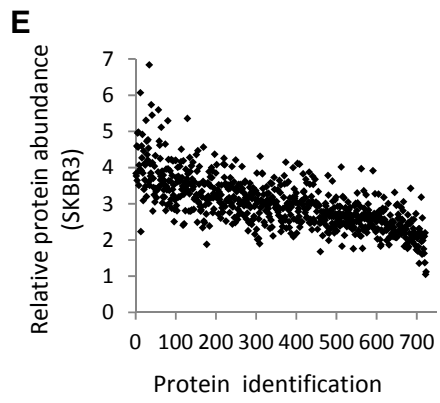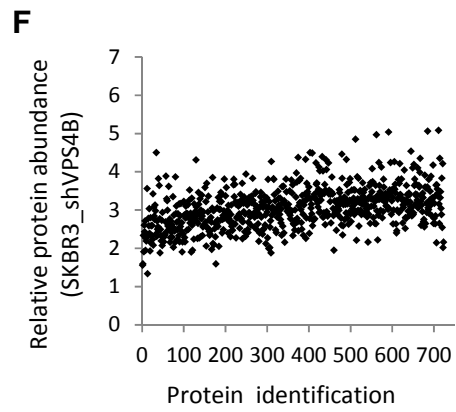

Supplementary Figure 2:

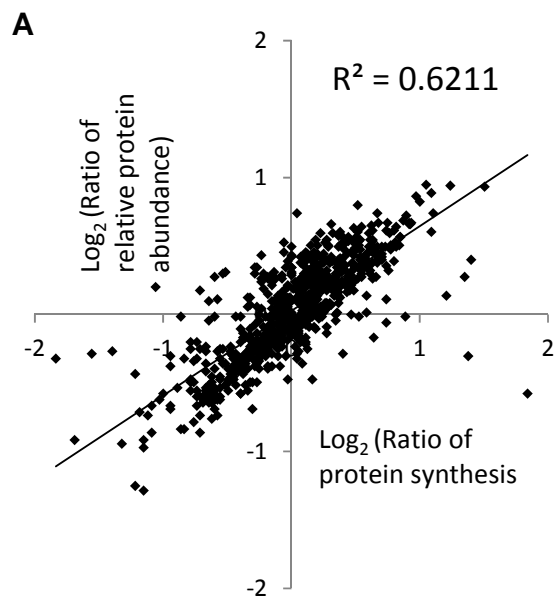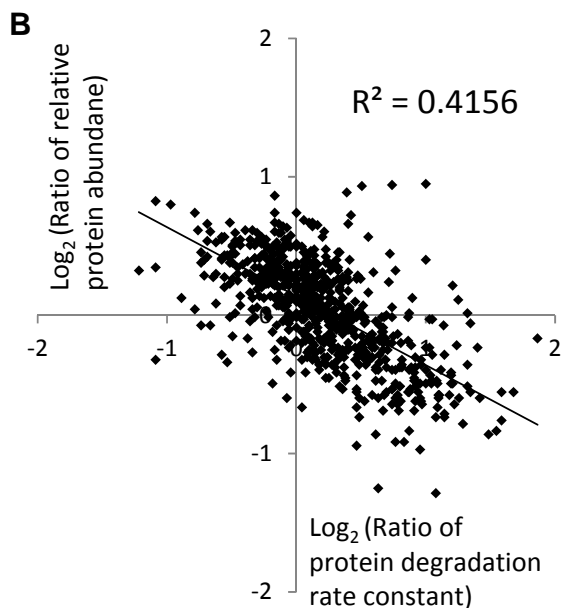

Supplemental Table 1. Changes of protein synthesis, degradation and relative abundance induced by VPS4B down-regulation in SKBR3 cells.

|                                     | # of proteins with increased ratio* (> 1.5) | # of proteins with decreased ratio* (< 0.67) | # of proteins with unchanged ratio* (0.67 ≤ Ratio ≤ 1.5) |
|-------------------------------------|---------------------------------------------|----------------------------------------------|----------------------------------------------------------|
| Synthesis                           | 69 (9.5%)                                   | 69 (9.5%)                                    | 585 (80.9%)                                              |
| Degradation                         | 141 (19.5%)                                 | 24 (3.3%)                                    | 558 (77.2%)                                              |
| Relative protein abundance at 24 hr | 33 (4.56%)                                  | 38 (5.3%)                                    | 652 (90.2%)                                              |

Numbers were calculated from a total of 723 proteins.

\*: ratio = SKBR3\_shVPS4B vs. SKBR3

**Supplemental Table 2. Proteins with increased relative abundance at 24 hr.**

| Gene Name | UniProt Accession | Protein Name                                                                | Ratio* of Relative Protein Abundance at 24 hr | Ratio* of Protein Synthesis Rate | Ratio* of Protein Degradation Rate Constant |
|-----------|-------------------|-----------------------------------------------------------------------------|-----------------------------------------------|----------------------------------|---------------------------------------------|
| GPI       | P06744            | Glucose-6-phosphate isomerase                                               | 1.93                                          | 2.07                             | 2.00                                        |
| CNP       | P09543            | 2',3'-cyclic-nucleotide 3'-phosphodiesterase                                | 1.92                                          | 2.36                             | 1.67                                        |
| DSG2      | Q14126            | Desmoglein-2                                                                | 1.91                                          | 2.84                             | 1.42                                        |
| PSAP      | P07602            | Proactivator polypeptide                                                    | 1.85                                          | 2.13                             | 1.31                                        |
| ANXA2     | P07355            | Annexin A2                                                                  | 1.82                                          | 1.96                             | 0.89                                        |
| ACBD3     | Q9H3P7            | Golgi resident protein GCP60                                                | 1.77                                          | 2.00                             | 0.47                                        |
| HADH      | Q16836            | Hydroxyacyl-coenzyme A dehydrogenase, mitochondrial                         | 1.74                                          | 1.43                             | 0.51                                        |
| CD59      | P13987            | CD59 glycoprotein                                                           | 1.67                                          | 1.59                             | 0.89                                        |
| IDH3B     | O43837            | Isocitrate dehydrogenase [NAD] subunit beta, mitochondrial                  | 1.67                                          | 1.03                             | 0.58                                        |
| KRT79     | Q5XKE5            | Keratin, type II cytoskeletal 79                                            | 1.67                                          | 2.15                             | 1.00                                        |
| TPM1      | B72722            | Tropomyosin 1 (Alpha), isoform CRA_i                                        | 1.65                                          | 1.86                             | 1.34                                        |
| FLNA      | P21333            | Filamin-A                                                                   | 1.61                                          | 1.83                             | 1.04                                        |
| CLTB      | P09497            | Clathrin light chain B                                                      | 1.59                                          | 1.89                             | 1.09                                        |
| DAD1      | P61803            | Dolichyl-diphosphooligosaccharide--protein glycosyltransferase subunit DAD1 | 1.59                                          | 1.68                             | 0.70                                        |
| KRT7      | P08729            | Keratin, type II cytoskeletal 7                                             | 1.59                                          | 1.91                             | 1.07                                        |
| P4HA1     | P13674            | Prolyl 4-hydroxylase subunit alpha-1                                        | 1.59                                          | 1.60                             | 0.89                                        |
| IDH3A     | P50213            | Isocitrate dehydrogenase [NAD] subunit alpha, mitochondrial                 | 1.58                                          | 1.89                             | 0.62                                        |
| LGALS3BP  | Q08380            | Galectin-3-binding protein                                                  | 1.58                                          | 1.24                             | 1.32                                        |
| RTN4      | Q9NQC3            | Reticulon-4                                                                 | 1.58                                          | 1.90                             | 0.91                                        |
| EPB41L1   | Q9H4G0            | Band 4.1-like protein 1                                                     | 1.57                                          | 1.54                             | 1.12                                        |
| CALD1     | Q05682            | Caldesmon                                                                   | 1.56                                          | 1.76                             | 1.09                                        |
| LMNA      | P02545            | Prelamin-A/C                                                                | 1.56                                          | 1.46                             | 0.93                                        |
| HADHB     | P55084            | Trifunctional enzyme subunit beta, mitochondrial                            | 1.55                                          | 1.40                             | 0.95                                        |
| GLB1      | P16278            | Beta-galactosidase                                                          | 1.53                                          | 1.55                             | 0.76                                        |
| GSTK1     | Q9Y2Q3            | Glutathione S-transferase kappa 1                                           | 1.53                                          | 1.67                             | 0.59                                        |
| KRT14     | P02533            | Keratin, type I cytoskeletal 14                                             | 1.53                                          | 1.74                             | 0.79                                        |
| KHDRBS1   | Q07666            | KH domain-containing, RNA-binding, signal transduction-associated protein 1 | 1.52                                          | 1.43                             | 0.63                                        |
| RCC1      | P18754            | Regulator of chromosome condensation                                        | 1.52                                          | 1.30                             | 0.89                                        |
| SLC25A24  | Q6NUK1            | Calcium-binding mitochondrial carrier protein SCaMC-1                       | 1.52                                          | 2.13                             | 1.16                                        |
| HADHA     | P40939            | Trifunctional enzyme subunit alpha, mitochondrial                           | 1.51                                          | 1.17                             | 0.92                                        |
| CKMT1A    | P12532            | Creatine kinase U-type, mitochondrial                                       | 1.51                                          | 1.25                             | 0.91                                        |
| MFSD10    | Q14728            | Major facilitator superfamily domain-containing protein 10                  | 1.51                                          | 1.52                             | 0.72                                        |
| RALA      | P11233            | Ras-related protein Ral-A                                                   | 1.51                                          | 1.70                             | 0.81                                        |

\*: Ratio = SKBR3\_shVPS4B vs. SKBR3

**Supplemental Table 3. Proteins with decreased relative abundance at 24 hr.**

| Gene Name | UniProt Accession | Protein Name                                          | Ratio* of Relative Protein Abundance at 24 hr | Ratio* of Protein Synthesis Rate | Ratio* of Protein Degradation Rate Constant |
|-----------|-------------------|-------------------------------------------------------|-----------------------------------------------|----------------------------------|---------------------------------------------|
| S100A9    | P06702            | Protein S100-A9                                       | 0.41                                          | 0.45                             | 2.11                                        |
| S100A8    | P05109            | Protein S100-A8                                       | 0.42                                          | 0.43                             | 1.55                                        |
| HSPB1     | P04792            | Heat shock protein beta-1                             | 0.51                                          | 0.45                             | 1.94                                        |
| SLC9A3R1  | O14745            | Na(+)/H(+) exchange regulatory cofactor NHE-RF1       | 0.52                                          | 0.40                             | 1.38                                        |
| ASS1      | P00966            | Argininosuccinate synthase                            | 0.53                                          | 0.31                             | 1.78                                        |
| FASN      | P49327            | Fatty acid synthase                                   | 0.53                                          | 0.45                             | 1.70                                        |
| GGCT      | O75223            | Gamma-glutamylcyclotransferase                        | 0.55                                          | 0.61                             | 2.80                                        |
| LDHB      | P07195            | L-lactate dehydrogenase B chain                       | 0.55                                          | 0.47                             | 1.53                                        |
| ARPP19    | P56211            | cAMP-regulated phosphoprotein 19                      | 0.56                                          | 0.56                             | 1.83                                        |
| MIF       | P14174            | Macrophage migration inhibitory factor                | 0.56                                          | 0.55                             | 2.92                                        |
| TXN       | P10599            | Thioredoxin                                           | 0.58                                          | 0.59                             | 2.44                                        |
| LDHAL6A   | Q62MR3            | L-lactate dehydrogenase A-like 6A                     | 0.59                                          | 0.65                             | 3.00                                        |
| CPNE2     | Q96FN4            | Copine-2                                              | 0.60                                          | 0.67                             | 2.21                                        |
| EIF5A     | P63241            | Eukaryotic translation initiation factor 5A-1         | 0.60                                          | 0.61                             | 2.11                                        |
| PHGDH     | O43175            | D-3-phosphoglycerate dehydrogenase                    | 0.60                                          | 0.46                             | 1.40                                        |
| SELENBP1  | Q13228            | Selenium-binding protein 1                            | 0.61                                          | 0.44                             | 2.21                                        |
| C17orf25  | D3DTG9            | Chromosome 17 open reading frame 25, isoform CRA_d    | 0.62                                          | 0.52                             | 1.59                                        |
| EEF2      | P13639            | Elongation factor 2                                   | 0.62                                          | 0.66                             | 1.73                                        |
| UBE2O     | Q9C0C9            | Ubiquitin-conjugating enzyme E2 O                     | 0.62                                          | 0.81                             | 1.88                                        |
| ARHGDI1A  | P52565            | Rho GDP-dissociation inhibitor 1                      | 0.63                                          | 0.52                             | 1.38                                        |
| GART      | P22102            | Trifunctional purine biosynthetic protein adenosine-3 | 0.63                                          | 0.47                             | 2.13                                        |
| S100A13   | Q99584            | Protein S100-A13                                      | 0.63                                          | 0.60                             | 1.03                                        |
| HSP90AB1  | P08238            | Heat shock protein HSP 90-beta                        | 0.64                                          | 0.64                             | 1.72                                        |
| PPIAL4A   | Q9Y536            | Peptidylprolyl cis-trans isomerase A-like 4A/B/C      | 0.64                                          | 0.62                             | 1.67                                        |
| S100A6    | P06703            | Protein S100-A6                                       | 0.64                                          | 0.65                             | 2.33                                        |
| UBE2V1    | Q13404            | Ubiquitin-conjugating enzyme E2 variant 1             | 0.64                                          | 0.65                             | 1.96                                        |
| EEF1A1    | P68104            | Elongation factor 1-alpha 1                           | 0.65                                          | 0.68                             | 1.89                                        |
| IPO7      | O95373            | Importin-7                                            | 0.65                                          | 0.67                             | 1.75                                        |
| PDCD6     | O75340            | Programmed cell death protein 6                       | 0.65                                          | 0.64                             | 1.44                                        |
| SULT1A1   | P50225            | Sulfotransferase 1A1                                  | 0.65                                          | 0.49                             | 1.95                                        |
| AGR2      | O95994            | Anterior gradient protein 2 homolog                   | 0.66                                          | 0.62                             | 0.95                                        |
| CLIC1     | O00299            | Chloride intracellular channel protein 1              | 0.66                                          | 0.67                             | 2.39                                        |
| DNAJA1    | P31689            | DnaJ homolog subfamily A member 1                     | 0.66                                          | 0.61                             | 1.40                                        |
| DDT       | P30046            | D-dopachrome decarboxylase                            | 0.66                                          | 0.60                             | 1.94                                        |
| GAPDH     | P04406            | Glyceraldehyde-3-phosphate dehydrogenase              | 0.66                                          | 0.68                             | 2.14                                        |
| PPA1      | Q15181            | Inorganic pyrophosphatase                             | 0.66                                          | 0.66                             | 1.70                                        |
| TUBA1B    | P68363            | Tubulin alpha-1B chain                                | 0.66                                          | 0.63                             | 2.67                                        |
| UBA1      | P22314            | Ubiquitin-like modifier-activating enzyme 1           | 0.66                                          | 0.64                             | 1.55                                        |

\*: Ratio = SKBR3\_shVPS4B vs. SKBR3
